# Supplementary material for: Genetic Variants That Confer Resistance to Malaria Are Associated with Red Blood Cell Traits in African-Americans: An Electronic Medical Record-based Genome-Wide Association Study
Source: PubMed Central journal article supplement (PMC3704235; doi:10.1534/g3.113.006452), 2013-07-01
Supplement: supp_g3.113.006452_FigureS3.pdf [file supp_g3.113.006452_FigureS3.pdf]

RBC PC1 emerge1  
Adjusted for Age, Sex, Site, PC1, PC2

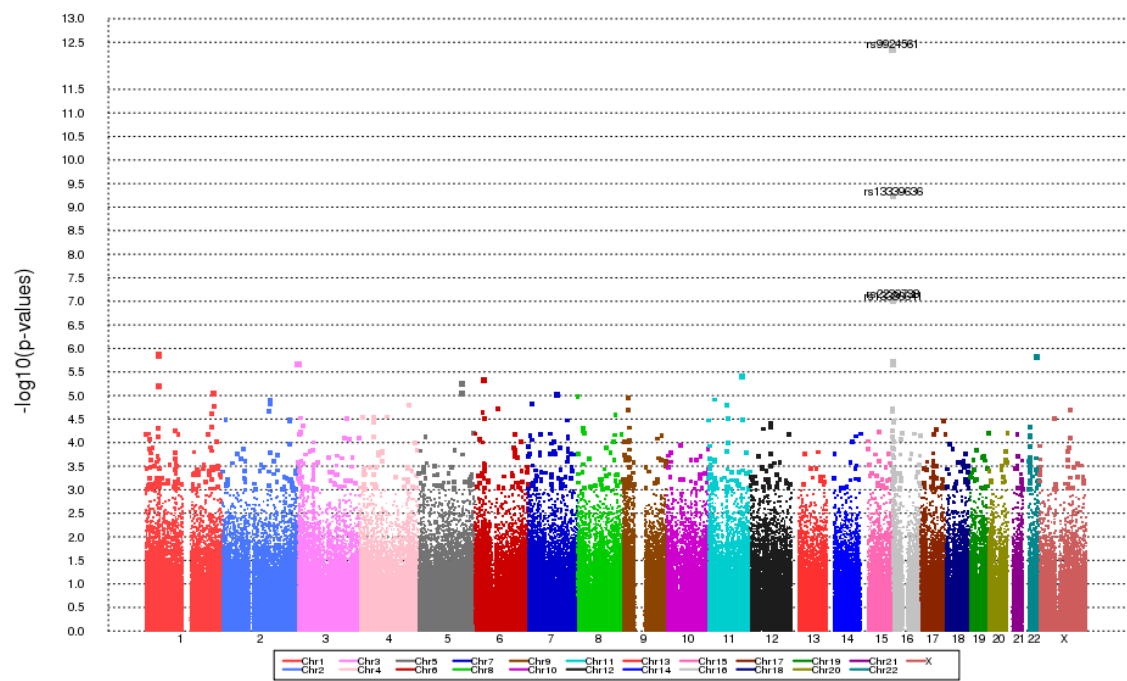

Figure S3 Manhattan plot for PC1
