# Supplementary material for: Genetic Variants That Confer Resistance to Malaria Are Associated with Red Blood Cell Traits in African-Americans: An Electronic Medical Record-based Genome-Wide Association Study
Source: PubMed Central journal article supplement (PMC3704235; doi:10.1534/g3.113.006452), 2013-07-01
Supplement: supp_g3.113.006452_TableS1.pdf [file supp_g3.113.006452_TableS1.pdf]

**Table S1** The mean  $\pm$  s.d. values of RBC traits before and after implementing the phenotyping algorithm in the combined cohorts

| Trait                            | Before exclusion | After exclusion <sup>1</sup> | P (Wilcox test) |
|----------------------------------|------------------|------------------------------|-----------------|
| HGB (g/dL)                       | 12.59 $\pm$ 1.58 | 12.77 $\pm$ 1.49             | 0.0007          |
| HCT (%)                          | 38.26 $\pm$ 4.43 | 38.76 $\pm$ 4.12             | 0.001           |
| RBC count ( $\times 10^{12}$ /L) | 4.45 $\pm$ 0.57  | 4.51 $\pm$ 0.52              | 0.006           |
| MCV (fL)                         | 86.38 $\pm$ 6.37 | 86.41 $\pm$ 6.29             | 0.979           |
| MCH (pg)                         | 28.43 $\pm$ 2.5  | 28.46 $\pm$ 2.49             | 0.715           |
| MCHC (% or g/dL)                 | 32.9 $\pm$ 1.19  | 32.92 $\pm$ 1.18             | 0.401           |

1. In total, 310 patients were excluded.
