# Supplementary material for: Genetic Variants That Confer Resistance to Malaria Are Associated with Red Blood Cell Traits in African-Americans: An Electronic Medical Record-based Genome-Wide Association Study
Source: PubMed Central journal article supplement (PMC3704235; doi:10.1534/g3.113.006452), 2013-07-01
Supplement: supp_g3.113.006452_TableS2.pdf [file supp_g3.113.006452_TableS2.pdf]

**Table S2** Pairwise correlation of six RBC traits

|           | HGB  | HCT  | RBC count | MCV  | MCH  | MCHC |
|-----------|------|------|-----------|------|------|------|
| HGB       | -    |      |           |      |      |      |
| HCT       | 0.95 | -    |           |      |      |      |
| RBC count | 0.73 | 0.79 | -         |      |      |      |
| MCV       | 0.20 | 0.14 | -0.46     | -    |      |      |
| MCH       | 0.32 | 0.17 | -0.39     | 0.92 | -    |      |
| MCHC      | 0.40 | 0.13 | -0.03     | 0.23 | 0.59 | -    |
